# Supplementary material for: Bicontinuous Cubic Liquid Crystals as Potential Matrices for Non-Invasive Topical Sampling of Low-Molecular-Weight Biomarkers
Source: MDPI journal article supplement (doi:10.3390/pharmaceutics15082031), 2023-07-28
Supplement: s1 [file s1]

# Bicontinuous Cubic Liquid Crystals as Potential Matrices for Non-Invasive Topical Sampling of Low-Molecular-Weight Biomarkers

Maxim Morin <sup>1,2</sup>, Sebastian Björklund <sup>1,2</sup>, Emelie J. Nilsson <sup>1,2</sup> and Johan Engblom <sup>1,2,\*</sup>

<sup>1</sup> Biofilms—Research Center for Biointerfaces, Malmö University, SE-205 06 Malmö, Sweden; maxim.morin@mau.se (M.M.); sebastian.bjorklund@mau.se (S.B.); emelie.nilsson@mau.se (E.J.N.)

<sup>2</sup> Department of Biomedical Science, Faculty of Health and Society, Malmö University, SE-205 06 Malmö, Sweden

\* Correspondence: johan.engblom@mau.se; Tel.: +46-70-608-7525

## S1. Determination of the lattice parameter $a$

The positions of the Bragg peaks (in  $q$ ) in the measured diffractograms are used to assign a liquid crystalline phase to each sample. The ratio between the Bragg peaks is determined by the conditions providing constructive and destructive interference, often described using Miller indices ( $hkl$ ), and is henceforth unique for each liquid crystalline phase (space group) [1]. The ratio, derived from the Miller indices, between Bragg peaks of bicontinuous cubic liquid crystalline phases investigated here are as follows:

Bicontinuous cubic primitive phase (Im3m):  $\sqrt{2}$ :  $\sqrt{4}$ :  $\sqrt{6}$ :  $\sqrt{8}$ :  $\sqrt{10}$ :  $\sqrt{12}$ :  $\sqrt{14}$ :  $\sqrt{16}$ ...

Bicontinuous cubic diamond phase (Pn3m):  $\sqrt{2}$ :  $\sqrt{3}$ :  $\sqrt{4}$ :  $\sqrt{6}$ :  $\sqrt{8}$ :  $\sqrt{9}$ :  $\sqrt{10}$ :  $\sqrt{11}$ ...

Bicontinuous cubic gyroid phase (Ia3d):  $\sqrt{6}$ :  $\sqrt{8}$ :  $\sqrt{14}$ :  $\sqrt{16}$ :  $\sqrt{20}$ :  $\sqrt{22}$ :  $\sqrt{24}$ :  $\sqrt{26}$ ...

This in combination with the lattice spacing  $d$ , where  $|q| = 2\pi/d$ , is used to determine the liquid crystalline phase's lattice parameter,  $a$ , which is the smallest repeat distance in the structure's unit cell, [1,2] using the following equation for cubic structures:

$$\frac{1}{d^2} = \frac{h^2 + k^2 + l^2}{a^2}$$

The lattice parameter  $a$  was determined using 3-6 Bragg peaks for each sample.

## S2. Method validation for HPLC-UV

**Table S1.** LOD and LOQ for Trp and Kyn. LOD is defined as  $3.3 \cdot \sigma / \text{Slope}$ , and LOQ is defined as  $10 \cdot \sigma / \text{Slope}$ , where  $\sigma$  is the standard error of the intercept.

|     | Trp ( $\mu\text{M}$ ) | Kyn ( $\mu\text{M}$ ) |
|-----|-----------------------|-----------------------|
| LOD | 0.14                  | 0.23                  |
| LOQ | 0.43                  | 0.69                  |

**Table S2.** Precision of quantification of the analytical method. Calibration solutions were prepared for Trp and Kyn. The analyte peak areas were determined over three different days. The coefficient of variation is defined as  $\text{CV} = \text{SD} / \text{Mean} \times 100\%$ , the precision is defined as  $100\% - \text{CV}$ .

| C ( $\mu\text{M}$ ) | Mean (a.u.) |       | SD (a.u.) |      | CV (%) |     | Precision (%) |      |
|---------------------|-------------|-------|-----------|------|--------|-----|---------------|------|
|                     | Trp         | Kyn   | Trp       | Kyn  | Trp    | Kyn | Trp           | Kyn  |
| 3.125               | 35.9        | 28.9  | 1.0       | 0.4  | 2.7    | 1.3 | 97.3          | 98.7 |
| 6.25                | 71.6        | 55.8  | 1.2       | 1.0  | 1.7    | 1.8 | 98.3          | 98.2 |
| 12.5                | 141.8       | 111.0 | 1.6       | 1.8  | 1.1    | 1.6 | 98.9          | 98.4 |
| 25                  | 282.9       | 220.7 | 4.3       | 3.6  | 1.5    | 1.6 | 98.5          | 98.4 |
| 50                  | 562.0       | 439.4 | 9.1       | 8.2  | 1.6    | 1.9 | 98.4          | 98.1 |
| 100                 | 1120.7      | 876.1 | 18.8      | 14.1 | 1.7    | 1.6 | 98.3          | 98.4 |

**Table S3.** Accuracy of the analytical method. Calibration solutions were prepared for Trp and Kyn. The analyte concentrations were determined over three different days. The coefficient of variation is defined as  $\text{CV} = \text{SD} / \text{Mean} \times 100\%$ , the accuracy is defined as  $100\% - \text{CV}$ .

| C ( $\mu\text{M}$ ) | Mean ( $\mu\text{M}$ ) |       | SD ( $\mu\text{M}$ ) |     | CV (%) |     | Accuracy (%) |      |
|---------------------|------------------------|-------|----------------------|-----|--------|-----|--------------|------|
|                     | Trp                    | Kyn   | Trp                  | Kyn | Trp    | Kyn | Trp          | Kyn  |
| 3.125               | 3.0                    | 3.1   | 0.1                  | 0.1 | 3.9    | 2.2 | 96.1         | 97.8 |
| 6.25                | 6.2                    | 6.2   | 0.1                  | 0.1 | 1.5    | 1.5 | 98.5         | 98.5 |
| 12.5                | 12.5                   | 12.5  | 0.2                  | 0.0 | 1.3    | 0.2 | 98.7         | 99.8 |
| 25                  | 25.1                   | 25.0  | 0.1                  | 0.1 | 0.3    | 0.2 | 99.7         | 99.8 |
| 50                  | 50.0                   | 50.0  | 0.4                  | 0.2 | 0.7    | 0.3 | 99.3         | 99.7 |
| 100                 | 100.0                  | 100.0 | 0.2                  | 0.1 | 0.2    | 0.1 | 99.8         | 99.9 |

### S3. The effect of the cationic lipid DOTAP on the phase behavior of GMO-water

The binary phase diagram of GMO-water has been well investigated in the broad range of temperatures (20-120 °C) and water content [3-6]. It is known that depending on temperature and hydration level, GMO can form a lamellar phase ( $L\alpha$ ), two bicontinuous cubic phases: the gyroid ( $Ia3d$ ) phase and the double diamond ( $Pn3m$ ) phase, a hexagonal phase ( $H_{II}$ ) and a fluid isotropic ( $L_2$ ) phase. One aim of this work was to investigate how the addition of a cationic lipid DOTAP will affect the phase behaviour of GMO. DOTAP forms a lamellar phase when hydrated, which swells up to a final lattice parameter of around 708 Å. Further addition of water leads to a coexistence between fully swollen unilamellar vesicles and excess of water. SAXD results for three different concentrations of DOTAP (1.25, 2.5 and 5 wt %) in water are shown in **Figure S1**.

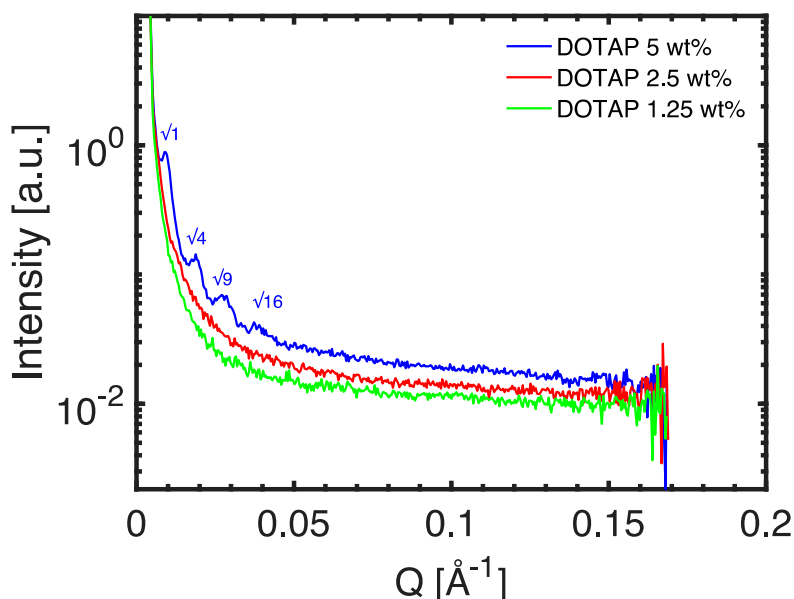

**Figure S1.** Diffraction patterns of DOTAP 5 wt % (blue), 2.5 wt % (red) and 1.25 wt % (green) in H<sub>2</sub>O.

In total five series of samples containing GMO and DOTAP at ratios 97.5:2.5, 95:5, 90:10, 85:15 and 80:20 % (w/w) respectively were prepared, in which the water content was varied from 15 to 99 % (w/w) keeping the lipid ratios constant. The diffraction patterns for GMO with different compositions of DOTAP and water obtained from SAXD measurements at 25 °C are shown in **Figure S2**. Pure GMO at 15 wt % H<sub>2</sub>O forms a lamellar phase ( $L\alpha$ ), which goes over to a bicontinuous cubic phase  $Ia3d$  observed at 30 wt % H<sub>2</sub>O. Higher amount of water added to GMO causes a phase transition into the  $Pn3m$  phase, which then coexists with excess of water (> 40 wt % H<sub>2</sub>O). Addition of a small amount of cationic lipid DOTAP (2.5 wt %) to GMO, results in the formation of  $Ia3d$  phase already at 15 wt % of H<sub>2</sub>O, which then swells up 30 wt % of H<sub>2</sub>O. The presence of DOTAP (even at small quantities) causes the formation of a third bicontinuous cubic phase, which is not observed in case of pure GMO, namely,  $Im3m$  phase. Increase in water content leads to a substantial swelling of  $Im3m$  phase, which eventually changes to a lamellar phase (in samples with DOTAP  $\geq$  10 wt %). Interestingly that at DOTAP content up to 5 wt % of total lipid content increase in the water above 90 wt % resulted in the decrease of the lattice parameter, which could be due to the escape of DOTAP into the aqueous solution resulting in a decreased charge of the lipid bilayer.

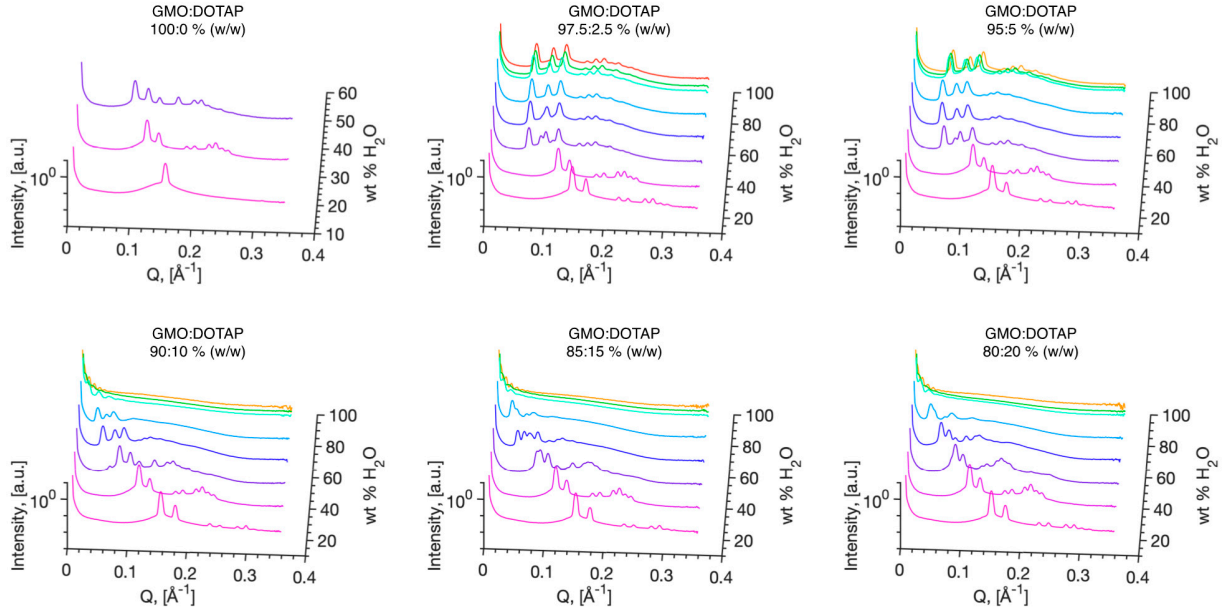

**Figure S2.** Electrostatic swelling of GMO in water caused by addition of different amounts of cationic lipid DOTAP at 25 °C. For pure GMO data shows diffraction patterns obtained from 15, 30 and 45 wt % H<sub>2</sub>O, which represent a L $\alpha$  phase, Ia3d phase and Pn3m phase. Above 40 wt % H<sub>2</sub>O Pn3m phase coexists with the excess of water. Addition of DOTAP (< 5 wt %) to GMO results in a substantial swelling and formation of an additional bicontinuous cubic phase Im3m. Higher amount of DOTAP (between 10 and 20 wt %) results in even stronger swelling and phase transition into L $\alpha$  phase at water contents above 90 wt %.

From the lattice parameter,  $a$ , it is possible to determine the radius of water channels in the cubic phase based on the minimal surface approach [7]:

$$r = \left( -\frac{\sigma}{2\pi\chi} \right)^{1/2} a - l$$

where  $l$  is the monolayer thickness, which can be determined accordingly:

$$\phi_l = 2\sigma \left( \frac{l}{a} \right) + \frac{4}{3}\pi\chi \left( \frac{l}{a} \right)^3$$

where  $\chi$  is the Euler-Poincaré characteristic and  $\sigma$  is the ratio of the minimal surface area in a unit cell to the quantity (unit cell volume)<sup>2/3</sup>, which for  $\chi^{\text{Pn3m}} = -2$ ,  $\sigma^{\text{Pn3m}} = 1.919$ ;  $\chi^{\text{Im3m}} = -4$ ,  $\sigma^{\text{Im3m}} = 2.345$ ; and  $\chi^{\text{Ia3d}} = -8$ ,  $\sigma^{\text{Ia3d}} = 3.091$  respectively. The radius of the water channel for the three cubic phases are:

$$\text{For Ia3d: } r = 0.248 \cdot a - l$$

$$\text{For Pn3m: } r = 0.391 \cdot a - l$$

$$\text{For Im3m: } r = 0.306 \cdot a - l$$

The average radii of curvature  $\langle R \rangle$  can be calculated from following:

$$\langle R \rangle = \left( \frac{-Ha^3}{2\pi\chi} \right)^{1/3}$$

Where  $H$  is the “homogeneity index”,  $H^{Pn3m} = 0.7498$ ,  $H^{Im3m} = 0.7163$  and  $H^{Ia3d} = 0.7665$  (Engblom, Hyde, [7]). The minimal surface area per unit cell,  $A_{UC}$ , and the water channel length,  $L_w$ , can then be determined from the average radii of curvature as follows:

$$A_{UC} = -2\pi\chi\langle R \rangle^2$$

$$L_w = -\chi\langle R \rangle$$

Finally, it is possible to determine the volume fraction of the lipid from the average radii of curvature as:

$$\Phi_{lipid} = 1 - \Phi_{H_2O} = \frac{\left( 3 \left( \frac{\langle R \rangle}{l} \right)^2 - 1 \right)}{2 \left( \frac{\langle R \rangle}{l} \right)^3}$$

These equations were used to calculate the following:

**Table S4.** GMO:DOTAP 97.5:2.5 % (w/w).

| Lipid<br>(wt %) | H <sub>2</sub> O<br>(wt %) | a<br>(Å) | a/l   | r<br>(Å) | <R><br>(Å) | A <sub>uc</sub><br>(Å <sup>2</sup> ) | L <sub>w</sub><br>(Å) | Φ<br>lipid | Φ<br>H <sub>2</sub> O | Symmetry |
|-----------------|----------------------------|----------|-------|----------|------------|--------------------------------------|-----------------------|------------|-----------------------|----------|
| 84.480          | 15.520                     | 105.300  | 6.194 | 8.860    | 26.112     | 34273.211                            | 208.897               | 0.839      | 0.161                 | Ia3d     |
| 68.991          | 31.009                     | 127.868  | 7.522 | 14.711   | 31.709     | 50538.645                            | 253.669               | 0.727      | 0.273                 | Ia3d     |
| 54.623          | 45.377                     | 101.424  | 5.966 | 22.657   | 39.633     | 19738.582                            | 79.265                | 0.604      | 0.396                 | Pn3m     |
| 54.623          | 45.377                     | 132.623  | 7.801 | 23.583   | 40.511     | 41246.147                            | 162.044               | 0.593      | 0.407                 | Im3m     |
| 39.502          | 60.498                     | 100.009  | 5.883 | 22.103   | 39.080     | 19191.479                            | 78.159                | 0.611      | 0.389                 | Pn3m     |
| 39.502          | 60.498                     | 135.972  | 7.998 | 24.607   | 41.534     | 43355.261                            | 166.135               | 0.580      | 0.420                 | Im3m     |
| 24.899          | 75.101                     | 136.830  | 8.049 | 24.870   | 41.796     | 43904.438                            | 167.184               | 0.576      | 0.424                 | Im3m     |
| 10.097          | 89.903                     | 138.602  | 8.153 | 25.412   | 42.337     | 45048.614                            | 169.348               | 0.570      | 0.430                 | Im3m     |
| 7.594           | 92.406                     | 133.440  | 7.849 | 23.833   | 40.760     | 41755.622                            | 163.041               | 0.589      | 0.411                 | Im3m     |
| 2.501           | 97.499                     | 130.233  | 7.661 | 22.851   | 39.781     | 39772.441                            | 159.122               | 0.602      | 0.398                 | Im3m     |

**Table S5.** GMO:DOTAP 95:5 % (w/w).

| Lipid<br>(wt %) | H2O<br>(wt %) | a<br>(Å) | a/l   | r<br>(Å) | <R><br>(Å) | A <sub>UC</sub><br>(Å <sup>2</sup> ) | L <sub>w</sub><br>(Å) | Φ<br>lipid | Φ<br>H <sub>2</sub> O | Symmetry |
|-----------------|---------------|----------|-------|----------|------------|--------------------------------------|-----------------------|------------|-----------------------|----------|
| 84.950          | 15.050        | 101.360  | 5.962 | 8.137    | 25.135     | 31756.328                            | 201.081               | 0.860      | 0.140                 | Ia3d     |
| 68.780          | 31.220        | 133.595  | 7.859 | 16.132   | 33.129     | 55167.026                            | 265.030               | 0.715      | 0.285                 | Ia3d     |
| 53.234          | 46.766        | 106.429  | 6.261 | 24.614   | 41.588     | 21734.737                            | 83.177                | 0.579      | 0.421                 | Pn3m     |
| 53.234          | 46.766        | 138.602  | 8.153 | 25.412   | 42.337     | 45048.614                            | 169.348               | 0.570      | 0.430                 | Im3m     |
| 39.379          | 60.621        | 155.618  | 9.154 | 30.619   | 47.535     | 56788.549                            | 190.139               | 0.514      | 0.486                 | Im3m     |
| 25.380          | 74.620        | 160.248  | 9.426 | 32.036   | 48.949     | 60218.493                            | 195.797               | 0.500      | 0.500                 | Im3m     |
| 10.023          | 89.977        | 141.336  | 8.314 | 26.249   | 43.172     | 46843.147                            | 172.688               | 0.560      | 0.440                 | Im3m     |
| 7.425           | 92.575        | 135.972  | 7.998 | 24.607   | 41.534     | 43355.261                            | 166.135               | 0.580      | 0.420                 | Im3m     |
| 4.971           | 95.029        | 129.436  | 7.614 | 22.607   | 39.537     | 39287.275                            | 158.149               | 0.605      | 0.395                 | Im3m     |

**Table S6.** GMO:DOTAP 90:10 % (w/w).

| Lipid<br>(wt %) | H2O<br>(wt %) | a<br>(Å) | a/l    | r<br>(Å) | <R><br>(Å) | A <sub>UC</sub><br>(Å <sup>2</sup> ) | L <sub>w</sub><br>(Å) | Φ<br>lipid | Φ<br>H <sub>2</sub> O | Symmetry |
|-----------------|---------------|----------|--------|----------|------------|--------------------------------------|-----------------------|------------|-----------------------|----------|
| 84.329          | 15.671        | 99.939   | 5.879  | 7.785    | 24.783     | 30872.346                            | 198.262               | 0.876      | 0.124                 | Ia3d     |
| 70.009          | 29.991        | 134.064  | 7.886  | 16.248   | 33.245     | 55555.271                            | 265.961               | 0.700      | 0.300                 | Ia3d     |
| 54.200          | 45.800        | 111.378  | 6.552  | 26.549   | 43.522     | 23803.195                            | 87.045                | 0.556      | 0.444                 | Pn3m     |
| 54.200          | 45.800        | 141.336  | 8.314  | 26.249   | 43.172     | 46843.147                            | 172.688               | 0.560      | 0.440                 | Im3m     |
| 40.026          | 59.974        | 186.60   | 10.976 | 40.099   | 56.998     | 81649.627                            | 227.991               | 0.434      | 0.566                 | Im3m     |
| 25.072          | 74.928        | 289.250  | 17.015 | 71.511   | 88.354     | 196196.187                           | 353.415               | 0.285      | 0.715                 | Im3m     |
| 9.983           | 90.017        | 301.212  | 17.718 | 75.171   | 92.008     | 212759.497                           | 368.031               | 0.274      | 0.726                 | Im3m     |
| 9.983           | 90.017        | 406.416  | 23.907 |          |            |                                      |                       |            |                       | Lα       |
| 7.020           | 92.980        | 534.739  | 31.455 |          |            |                                      |                       |            |                       | Lα       |
| 7.020           | 92.980        | 402.800  | 23.694 | 106.257  | 123.039    | 380471.359                           | 492.154               | 0.206      | 0.794                 | Im3m     |
| 4.972           | 95.028        | 708.843  | 41.697 |          |            |                                      |                       |            |                       | Lα       |

**Table S7.** GMO:DOTAP 85:15 % (w/w).

| Lipid<br>(wt %) | H2O<br>(wt %) | a<br>(Å) | a/l    | r<br>(Å) | <R><br>(Å) | AUC<br>(Å <sup>2</sup> ) | Lw<br>(Å) | Φ<br>lipid | Φ<br>H <sub>2</sub> O | Symmetry |
|-----------------|---------------|----------|--------|----------|------------|--------------------------|-----------|------------|-----------------------|----------|
| 84.840          | 15.160        | 101.360  | 5.962  | 8.137    | 25.135     | 31756.328                | 201.081   | 0.860      | 0.140                 | Ia3d     |
| 69.659          | 30.341        | 133.595  | 7.859  | 16.132   | 33.129     | 55167.026                | 265.030   | 0.702      | 0.298                 | Ia3d     |
| 54.983          | 45.017        | 178.173  | 10.481 | 27.187   | 44.183     | 98125.672                | 353.465   | 0.549      | 0.451                 | Ia3d     |
| 54.983          | 45.017        | 111.954  | 6.586  | 26.774   | 43.747     | 24049.749                | 87.494    | 0.554      | 0.446                 | Pn3m     |
| 39.761          | 60.239        | 156.743  | 9.220  | 44.287   | 61.249     | 47142.260                | 122.498   | 0.406      | 0.594                 | Pn3m     |
| 39.761          | 60.239        | 195.034  | 11.473 | 42.681   | 59.575     | 89200.144                | 238.299   | 0.416      | 0.584                 | Im3m     |
| 24.796          | 75.204        | 223.317  | 13.136 | 70.317   | 87.264     | 95691.956                | 174.527   | 0.289      | 0.711                 | Pn3m     |
| 24.796          | 75.204        | 271.073  | 15.945 | 65.948   | 82.801     | 172311.827               | 331.206   | 0.304      | 0.696                 | Im3m     |
| 9.880           | 90.120        | 324.061  | 19.062 | 82.163   | 98.987     | 246262.387               | 395.949   | 0.255      | 0.745                 | Im3m     |
| 9.880           | 90.120        | 454.974  | 26.763 |          |            |                          |           |            |                       | Lα       |
| 7.568           | 92.432        | 402.800  | 23.694 | 106.257  | 123.039    | 380471.359               | 492.154   | 0.206      | 0.794                 | Im3m     |
| 7.568           | 92.432        | 534.739  | 31.455 |          |            |                          |           |            |                       | Lα       |
| 5.039           | 94.961        | 708.843  | 41.697 |          |            |                          |           |            |                       | Lα       |

**Table S8.** GMO:DOTAP 80:20 % (w/w).

| Lipid<br>(wt %) | H2O<br>(wt %) | a<br>(Å) | a/l    | r<br>(Å) | <R><br>(Å) | AUC<br>(Å <sup>2</sup> ) | Lw<br>(Å) | Φ<br>lipid | Φ<br>H <sub>2</sub> O | Symmetry |
|-----------------|---------------|----------|--------|----------|------------|--------------------------|-----------|------------|-----------------------|----------|
| 85.413          | 14.587        | 102.947  | 6.056  | 8.531    | 25.529     | 32758.700                | 204.229   | 0.851      | 0.149                 | Ia3d     |
| 69.549          | 30.451        | 139.030  | 8.178  | 17.479   | 34.476     | 59746.684                | 275.811   | 0.680      | 0.320                 | Ia3d     |
| 54.581          | 45.419        | 184.341  | 10.844 | 28.716   | 45.713     | 105036.471               | 365.700   | 0.532      | 0.468                 | Ia3d     |
| 54.581          | 45.419        | 114.330  | 6.725  | 27.703   | 44.676     | 25081.744                | 89.352    | 0.543      | 0.457                 | Pn3m     |
| 40.044          | 59.956        | 156.743  | 9.220  | 44.287   | 61.249     | 47142.260                | 122.498   | 0.406      | 0.594                 | Pn3m     |
| 24.927          | 75.073        | 214.425  | 12.613 | 66.840   | 83.789     | 88223.405                | 167.578   | 0.300      | 0.700                 | Pn3m     |
| 24.927          | 75.073        | 261.269  | 15.369 | 62.948   | 79.807     | 160073.604               | 319.227   | 0.315      | 0.685                 | Im3m     |
| 10.016          | 89.984        | 532.082  | 31.299 | 145.817  | 162.529    | 663895.988               | 650.115   | 0.156      | 0.844                 | Im3m     |
| 10.016          | 89.984        | 417.487  | 24.558 |          |            |                          |           |            |                       | Lα       |
| 7.505           | 92.495        | 663.117  | 39.007 | 185.914  | 202.554    | 1031153.665              | 810.218   | 0.126      | 0.874                 | Im3m     |
| 7.505           | 92.495        | 516.709  | 30.395 |          |            |                          |           |            |                       | Lα       |
| 4.996           | 95.004        | 708.843  | 41.697 |          |            |                          |           |            |                       | Lα       |

The effect of DOTAP on the swelling is shown in **Figure S3**, data used for these results is presented in **Tables S4-S8**.

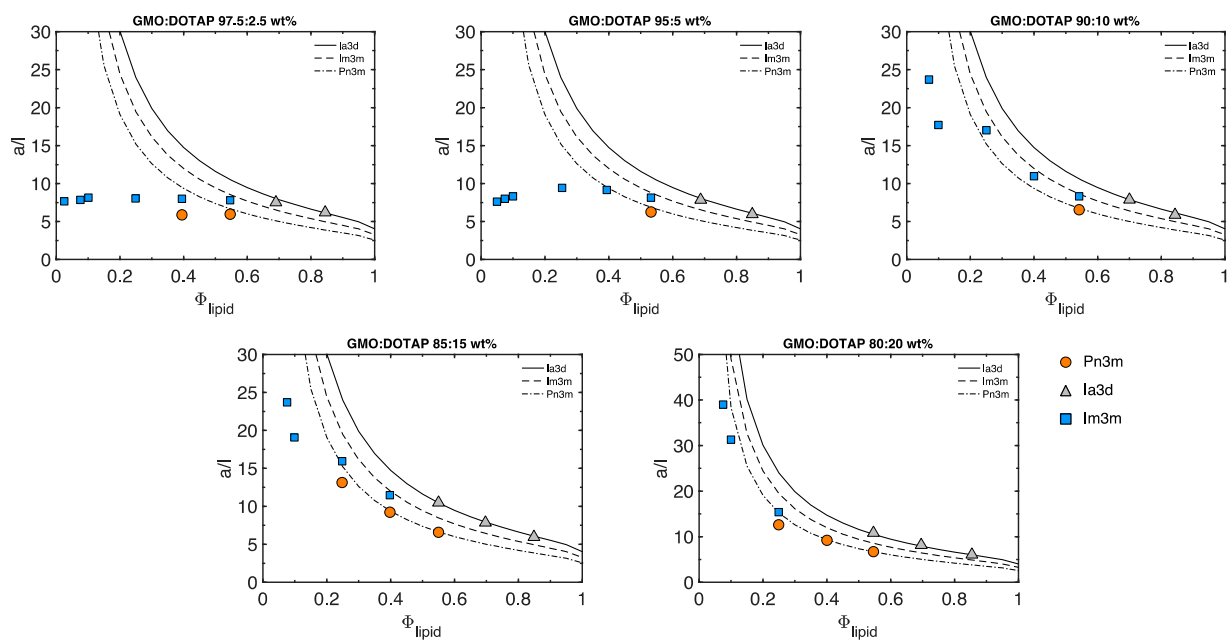

**Figure S3.** Swelling curves showing the ratio between the lattice parameter,  $a$ , and the lipid monolayer thickness,  $l$ , plotted as a function of the lipid weight fraction. The monolayer thickness for monoolein was used (17 Å).



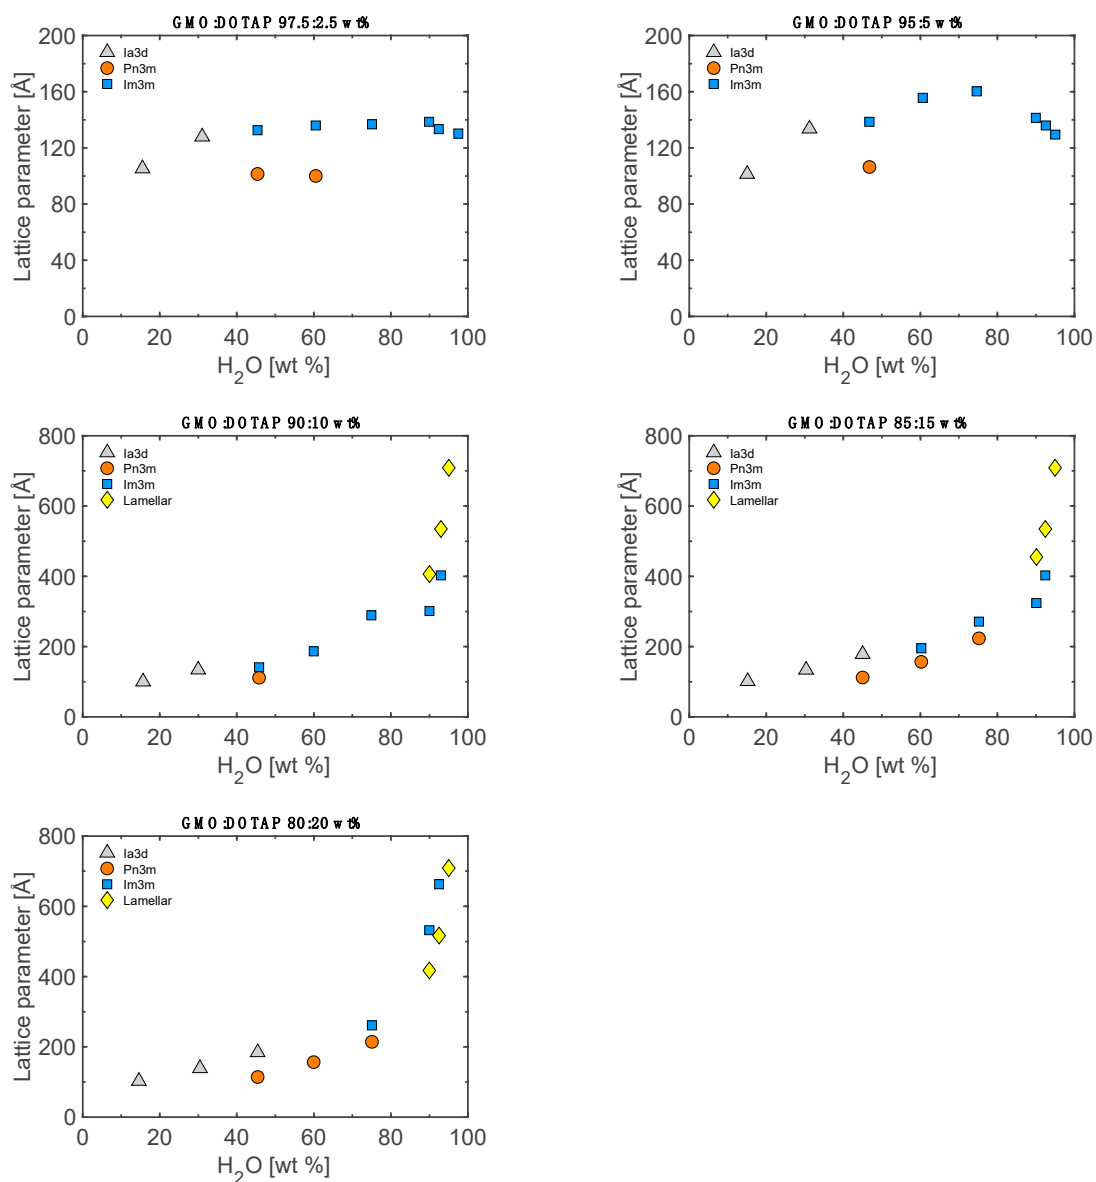

**Figure S4.** The change in the lattice parameter as function of DOTAP composition ranging from 2.5 wt % to 20 wt % of the total lipid content at various water contents.

## S4. The effect of counter ions on the electrostatic swelling

The electrostatic swelling is strongly suppressed by the  $\text{Cl}^-$  counterions. Im3m is not observed in any composition of GMO:DOTAP: $\text{H}_2\text{O}$ .

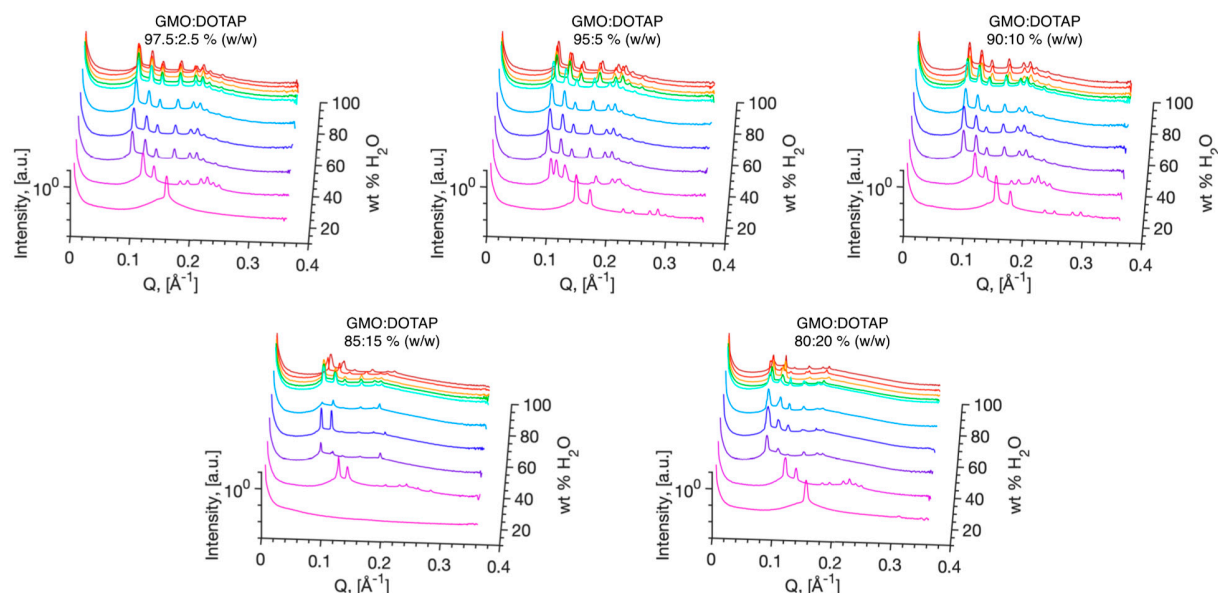

**Figure S5.** The effect of NaCl (150 mM) on the electrostatic swelling of GMO with various amounts of DOTAP.

## References

1. Smart, L.E.; Moore, E.A. *Solid State Chemistry: An Introduction*, Third Edition (3rd ed.) ed.; CRC Press: 2005.
2. Seddon, J.M.; Templer, R.H. Chapter 3 - Polymorphism of Lipid-Water Systems. In *Handbook of Biological Physics*, Lipowsky, R., Sackmann, E., Eds.; North-Holland: 1995; Volume 1, pp. 97-160.
3. Larsson, K. 2 Cubic Phases in Monoolein Water-System. *Nature* **1983**, *304*, 664-664, doi:DOI 10.1038/304664c0.
4. Hyde, S.T.; Andersson, S.; Ericsson, B.; Larsson, K. A Cubic Structure Consisting of a Lipid Bilayer Forming an Infinite Periodic Minimum Surface of the Gyroid Type in the Glycerolmonooleate-Water System. *Zeitschrift Fur Kristallographie* **1984**, *168*, 213-219, doi:DOI 10.1524/zkri.1984.168.1-4.213.
5. Briggs, J.; Chung, H.; Caffrey, M. The temperature-composition phase diagram and mesophase structure characterization of the monoolein/water system. *J. Phys. II* **1996**, *6*, 723-751.
6. Qiu, H.; Caffrey, M. The phase diagram of the monoolein/water system: metastability and equilibrium aspects. *Biomaterials* **2000**, *21*, 223-234, doi:Doi 10.1016/S0142-9612(99)00126-X.
7. Engblom, J.; Hyde, S. On the swelling of bicontinuous lyotropic mesophases. *J. Phys. II* **1995**, *5*, 171-190.
